# Supplementary material
Source: PubMed Central journal article supplement (PMC4930375)
Supplement: NIHMS792054-supplement-10.pdf [file NIHMS792054-supplement-10.pdf]

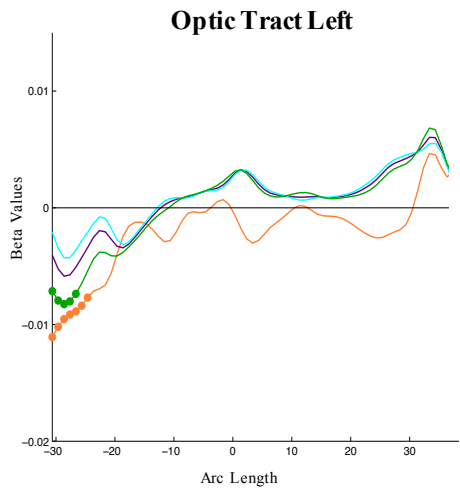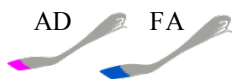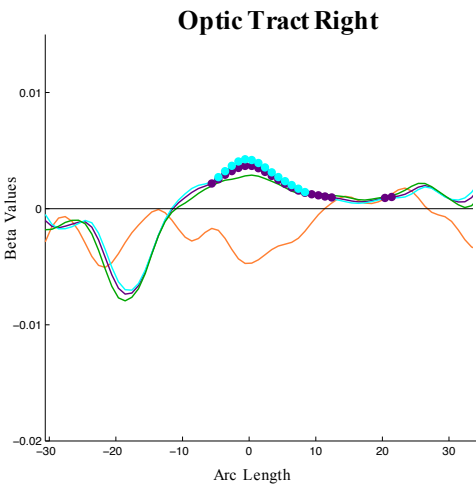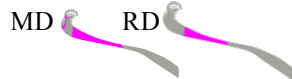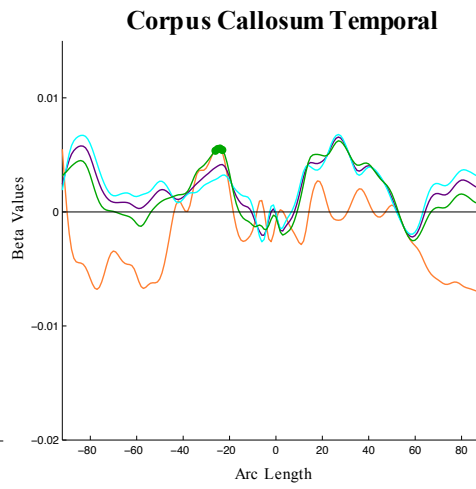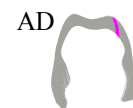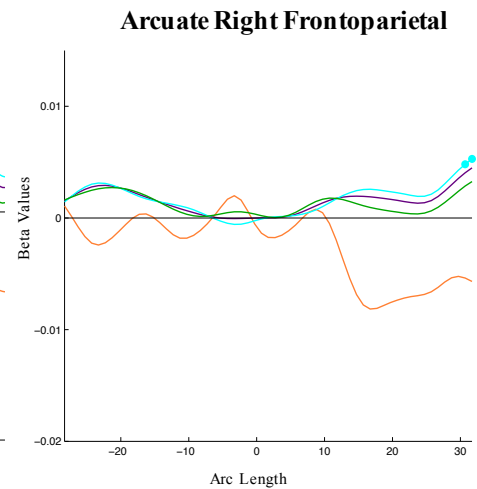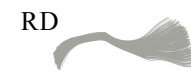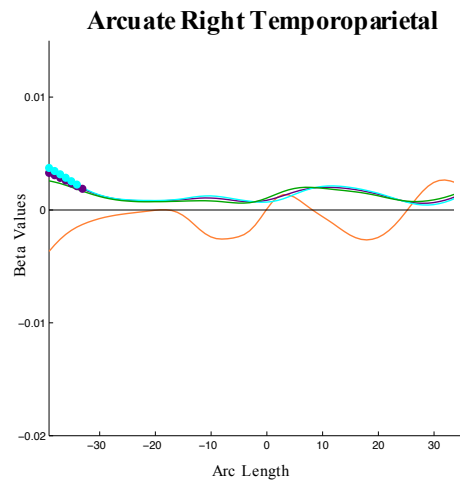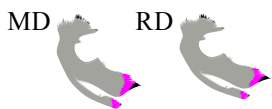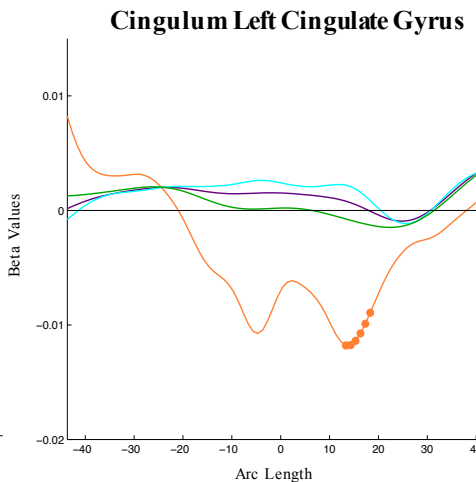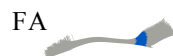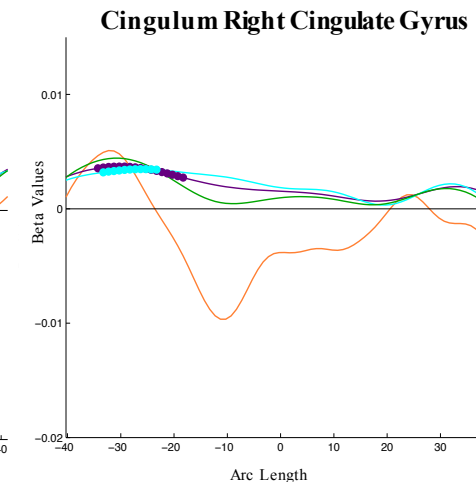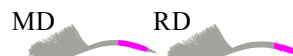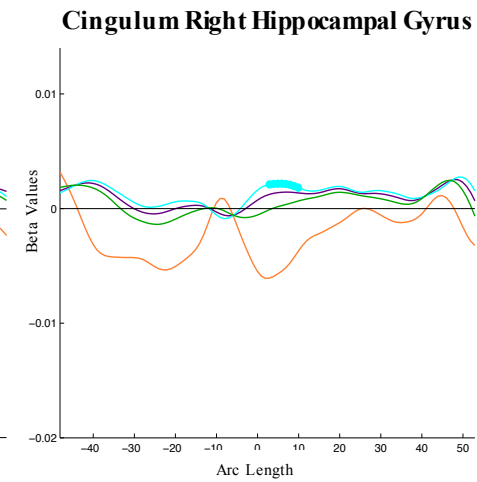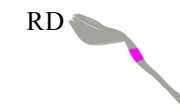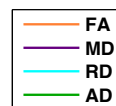

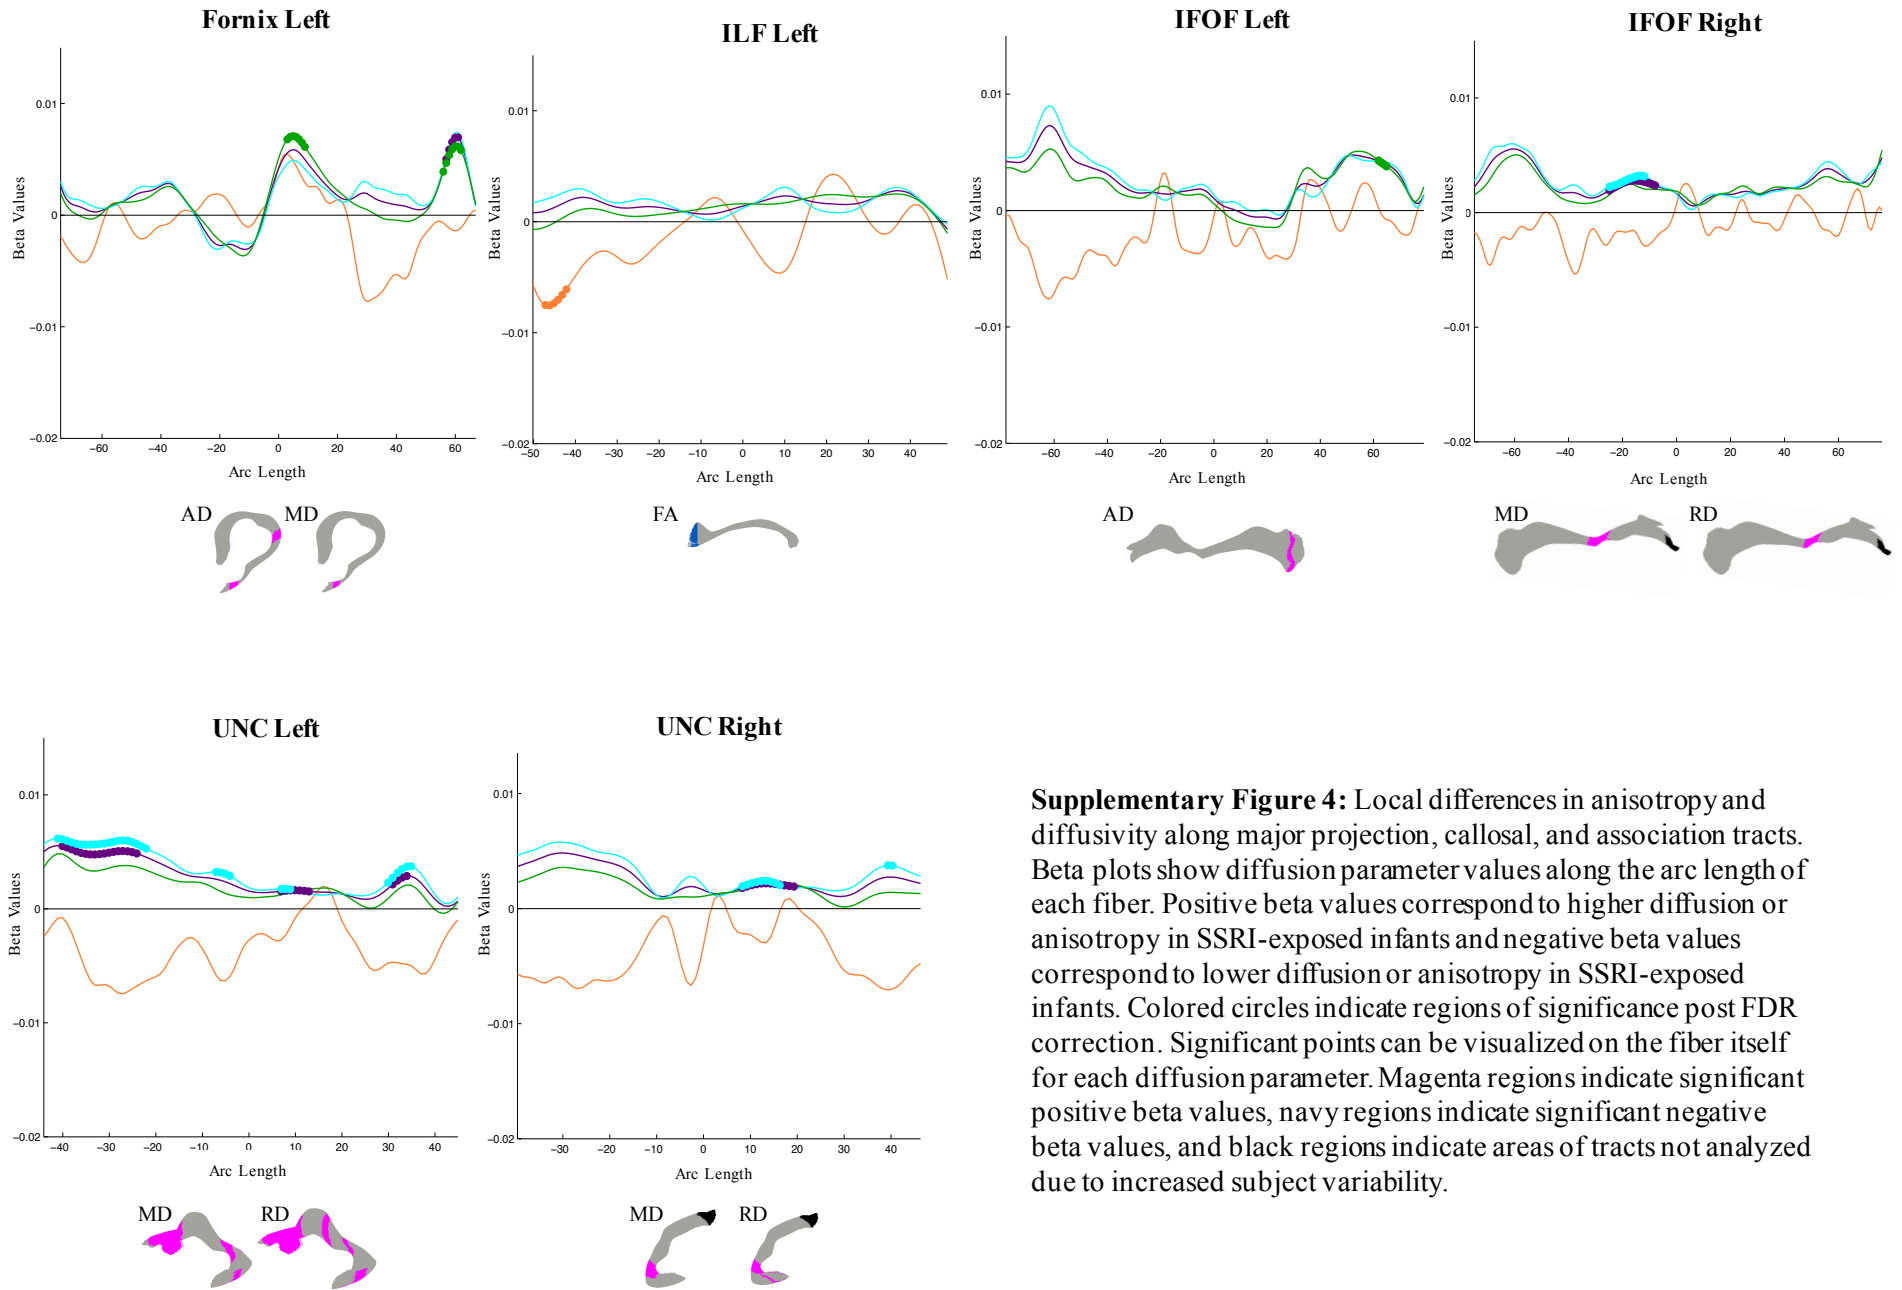

**Supplementary Figure 4:** Local differences in anisotropy and diffusivity along major projection, callosal, and association tracts. Beta plots show diffusion parameter values along the arc length of each fiber. Positive beta values correspond to higher diffusion or anisotropy in SSRI-exposed infants and negative beta values correspond to lower diffusion or anisotropy in SSRI-exposed infants. Colored circles indicate regions of significance post FDR correction. Significant points can be visualized on the fiber itself for each diffusion parameter. Magenta regions indicate significant positive beta values, navy regions indicate significant negative beta values, and black regions indicate areas of tracts not analyzed due to increased subject variability.
