# Supplementary material
Source: PubMed Central journal article supplement (PMC4930375)
Supplement: NIHMS792054-supplement-11.pdf [file NIHMS792054-supplement-11.pdf]

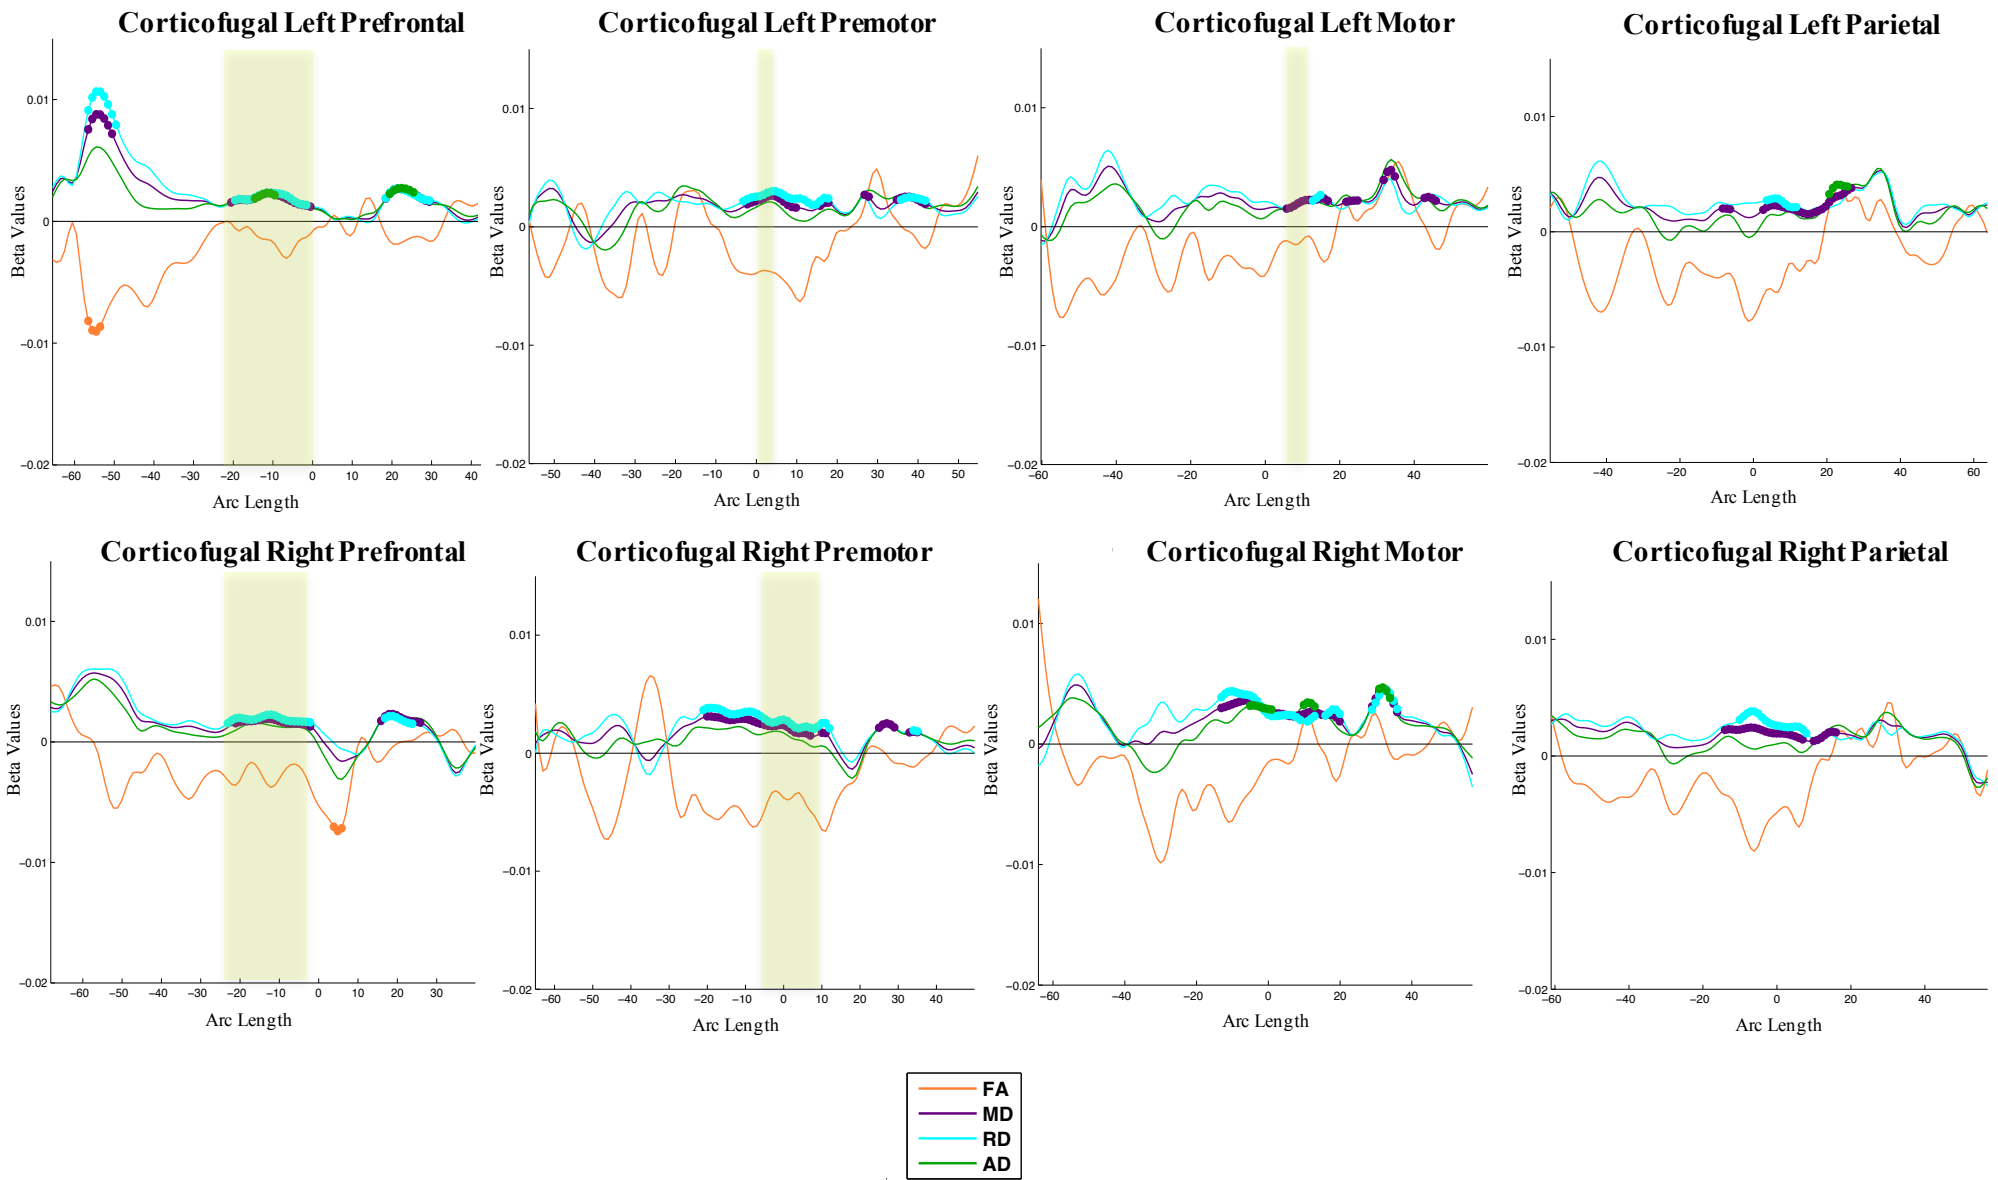

**Supplementary Figure 5:** Local differences in anisotropy and diffusivity along corticofugal tracts. Beta plots show diffusion parameter values along the arc length of each fiber. Positive beta values correspond to higher diffusion or anisotropy in SSRI-exposed infants and negative beta values correspond to lower diffusion or anisotropy in SSRI-exposed infants. Colored circles indicate regions of significance post FDR correction. Yellow bars represent regions along tracts that show significant influences of DTI direction.
